# Supplementary material for: A non-invasive far-red light-induced split-Cre recombinase system for controllable genome engineering in mice
Source: PubMed Central journal article supplement (PMC7381682; doi:10.1038/s41467-020-17530-9), 2020-07-24
Supplement: 41467_2020_17530_MOESM1_ESM.pdf [file 41467_2020_17530_MOESM1_ESM.pdf]

## **Supplementary Information**

### **A non-invasive far-red light-induced split-Cre recombinase system for controllable genome engineering in mice**

Jiali Wu *et al.*

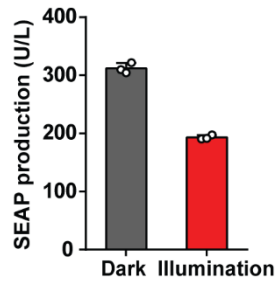

**Supplementary Figure 1. SEAP production of a far-red light-induced split Cre-*loxP* system.**  $6 \times 10^4$  HEK-293 cells per well were co-transfected with four plasmids: pXY137 ( $P_{hCMV}$ -p65-VP64-BldD-pA:: $P_{hCMV}$ -BphS-P2A-YhjH-pA, 100 ng), pXY110 ( $P_{hCMV}$ -CreN59-L0-Coh2-NES-pA, 100 ng), pXY111 ( $P_{FRLa}$ -NLS- DocS-L0-CreC60-pA, 100 ng), pGY125 ( $P_{hCMV}$ -*loxP*-STOP-*loxP*-SEAP-pA, 200 ng), and then illuminated for 6 h with FRL ( $1.5 \text{ mW cm}^{-2}$ , 730 nm) each day for two days. SEAP expression in the culture supernatants was profiled at 48 h after the first illumination. Data represent the mean  $\pm$  SD;  $n = 3$  independent experiments. Source data is available in the Source Data file.

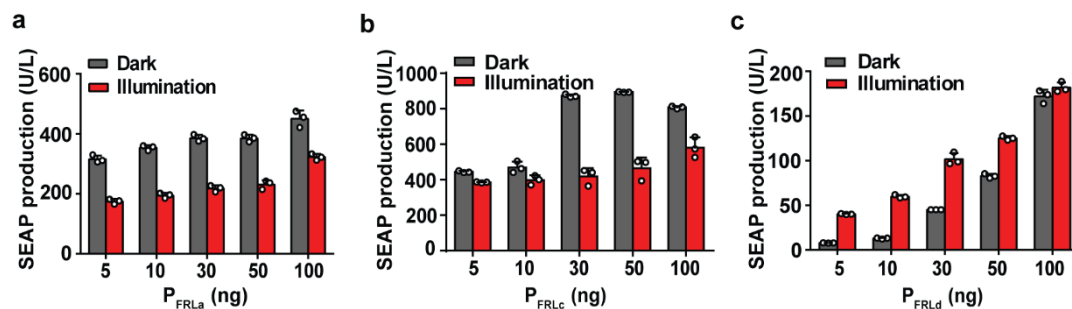

**Supplementary Figure 2. Optimization of the different FRL-responsive promoters  $P_{FRLx}$  driving DocS-CreC60 expression.**  $6 \times 10^4$  HEK-293 cells per well were co-transfected with pXY137 (100 ng), pXY110 (100 ng), pGY125 (SEAP reporter plasmid, 200 ng) and different amounts (5-100 ng) of (a) pXY111 ( $P_{FRLa}$ -NLS-DocS-L0-CreC60-pA), (b) pXY121 ( $P_{FRLc}$ -NLS-DocS-L0-CreC60-pA) or (c) pXY133 ( $P_{FRLd}$ -NLS-DocS-L0-CreC60-pA), and then illuminated for 6 h with FRL ( $1.5 \text{ mW cm}^{-2}$ , 730 nm) each day for two days. SEAP expression in the culture supernatants was profiled at 48 h after the first illumination. All data represent the mean  $\pm$  SD;  $n = 3$  independent experiments. Source data is available in the Source Data file.

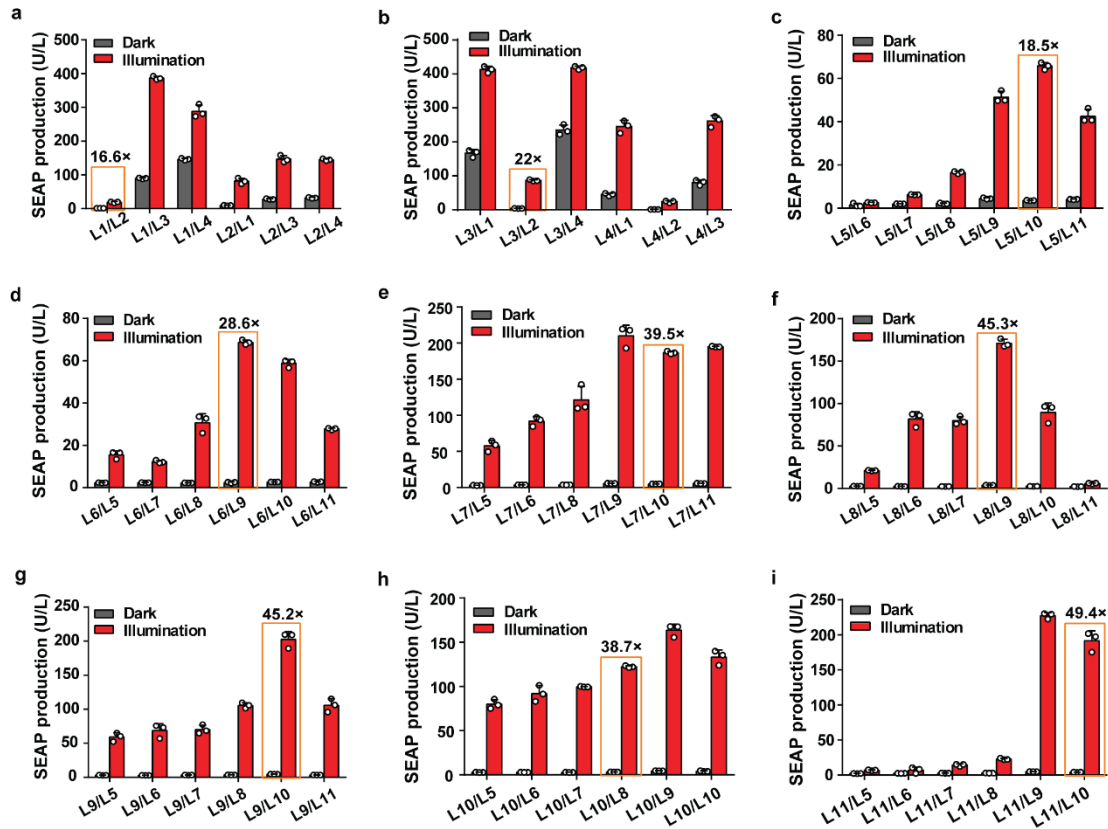

**Supplementary Figure 3. Optimization of different combination of the linker amino acid sequences between CreN59 and Coh2 as well as between CreC60 and DocS.** Different linker amino acid sequences are listed in **Supplementary Table 1**. **(a)** linker 1 combined with linker 2-4 and linker 2 combined with linker 1, 3, 4. **(b)** linker 3 combined with linker 1, 2, 4. **(c)** linker 5 combined with linker 6-11. **(d)** linker 6 combined with linker 5, 7, 8, 9, 10, 11. **(e)** linker 7 combined with linker 5, 6, 8, 9, 10, 11. **(f)** linker 8 combined with linker 5, 6, 7, 9, 10, 11. **(g)** linker 9 combined with linker 5, 6, 7, 8, 10, 11. **(h)** linker 10 combined with linker 5, 6, 7, 8, 9, 11. **(i)** linker 11 combined with linker 5-10.  $6 \times 10^4$  HEK-293 cells were co-transfected with pXY137 (100 ng), pGY125 (200 ng) and different combination of the plasmids encoding CreN59-Coh2 fusion protein or DocS-CreC60 fusion protein with different linkers (10 ng), **Supplementary Table 2**, and then illuminated for 6 h with FRL (1.5 mW cm<sup>-2</sup>, 730 nm) each day for two days. SEAP expression in the culture supernatants was profiled at 48 h after the first illumination. All data represent the mean  $\pm$  SD;  $n = 3$  independent experiments. The orange frame marks the highest-fold induction mediated by the FISC system. Source data is available in the Source Data file.

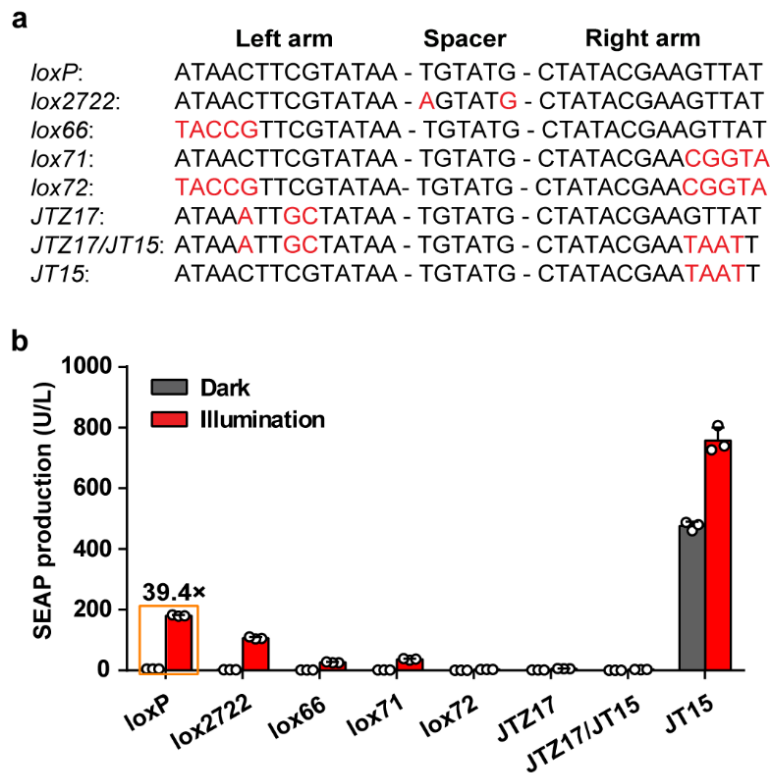

**Supplementary Figure 4. The catalytic activity of CreN59/CreC60 for different *loxP* mutants.** (a) Different mutated *loxP* sequences and mutations are highlighted in red. (b) Optimization the CreN59/CreC60 catalytic activity for different *loxP* mutants.  $6 \times 10^4$  HEK-293 cells were co-transfected with pXY137 (100 ng), pXY169 (10 ng), pXY177 (10 ng) and different plasmids encoding *loxP* mutants (pGY125/pXY229/pXY230/pXY231/pXY232/pXY234/pXY235/pXY233, 200 ng), and then illuminated for 6 h with FRL ( $1.5 \text{ mW cm}^{-2}$ , 730 nm) each day for two days. SEAP expression in the culture supernatants was profiled at 48 h after the first illumination. Data represent the mean  $\pm$  SD;  $n = 3$  independent experiments. The orange frame marks the highest-fold induction mediated by the FISC system in this experiment. Source data is available in the Source Data file.

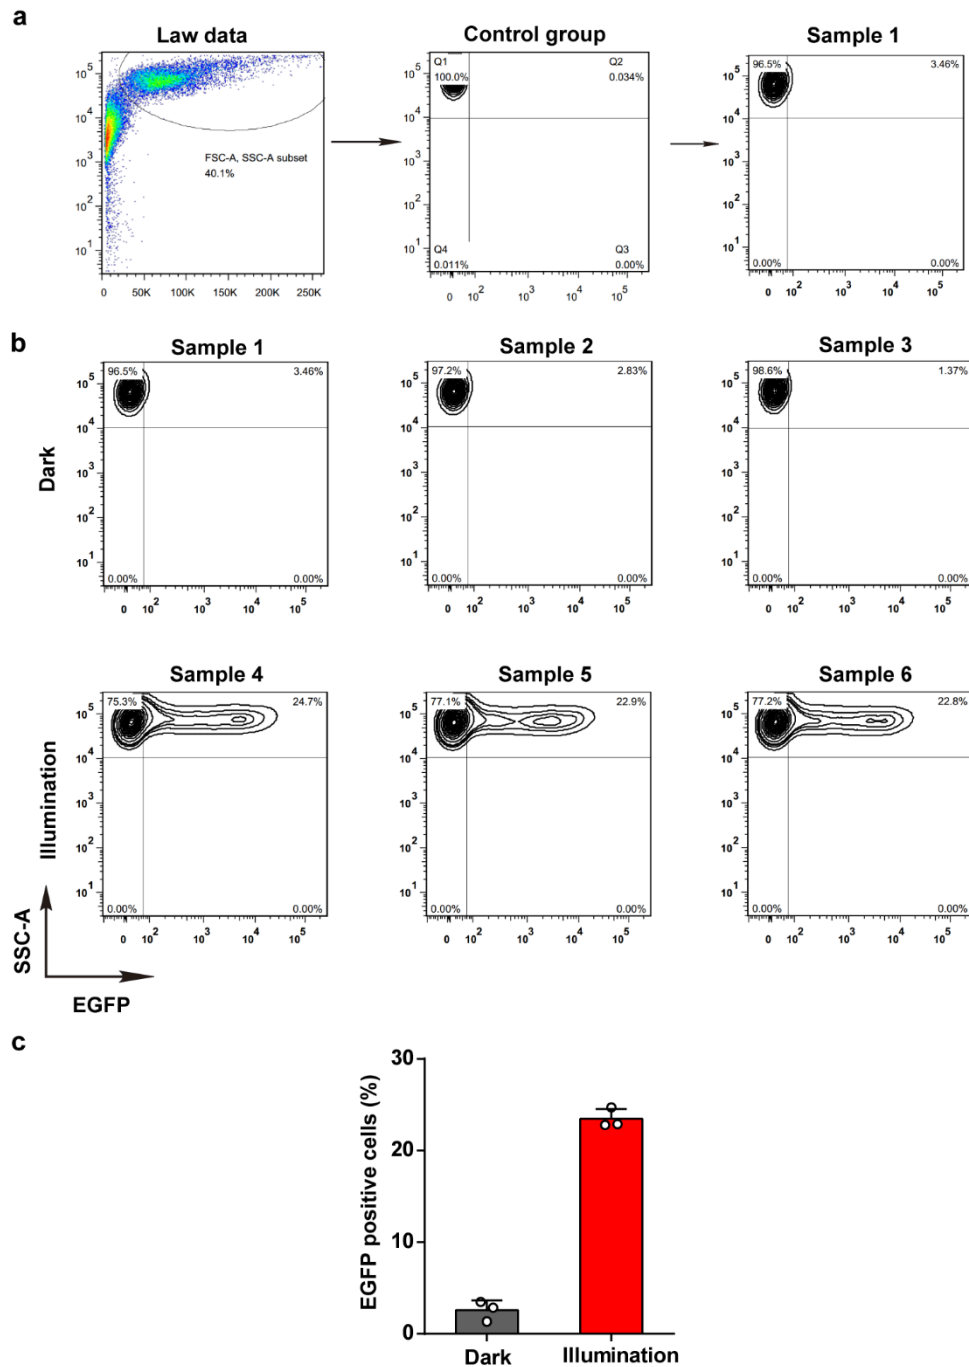

**Supplementary Figure 5. Flow cytometric analysis of FISC-mediated DNA recombination efficiency.** (a) Gating strategy to determine the percentage of Cre-catalyzed DNA recombination mediated by the FISC system. (b) Flow cytometry contour plots showing Cre-catalyzed DNA recombination mediated by FISC system. HEK-293 cells ( $6 \times 10^4$ ) were co-transfected with pXY137, pXY169 ( $P_{hCMV}$ -CreN59-L9-Coh2-NES-pA), pXY177 ( $P_{FRLd}$ -NLS-DocS-L9-CreC60-pA), and pDL78 ( $P_{hCMV}$ -*loxP*-STOP-*loxP*-EGFP-pA) at a ratio of 10:1:1:20 (w/w/w/w), illuminated for 6 h with FRL ( $1.5 \text{ mW cm}^{-2}$ , 730 nm) each day for two days. The expression of the reporter

EGFP was determined by flow cytometry at 48 h after the first illumination. (c) Quantification of the percentage of HEK-293 cells expressing EGFP shown in b. Data represent the mean  $\pm$  SD;  $n = 3$  independent experiments. Source data is available in the Source Data file.

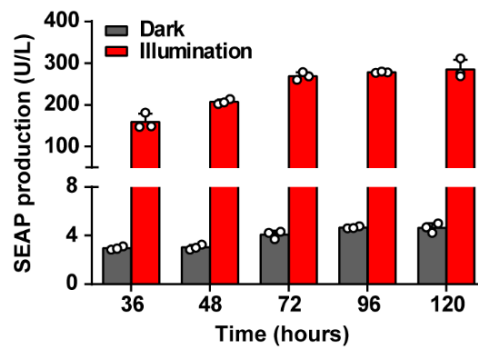

**Supplementary Figure 6. Time-dependent SEAP production mediated by the FISC system.**  $6 \times 10^4$  HEK-293 cells were co-transfected with pXY137, pXY169, pXY177 and pGY125 (SEAP reporter) at a 10:1:1:20 (w/w/w/w) ratio and illuminated with FRL ( $1.5 \text{ mW cm}^{-2}$ , 730 nm) for 6 h each day for two days. SEAP levels were profiled at different time points after the first illumination. All data represent the mean  $\pm$  SD;  $n = 3$  independent experiments. Source data is available in the Source Data file.

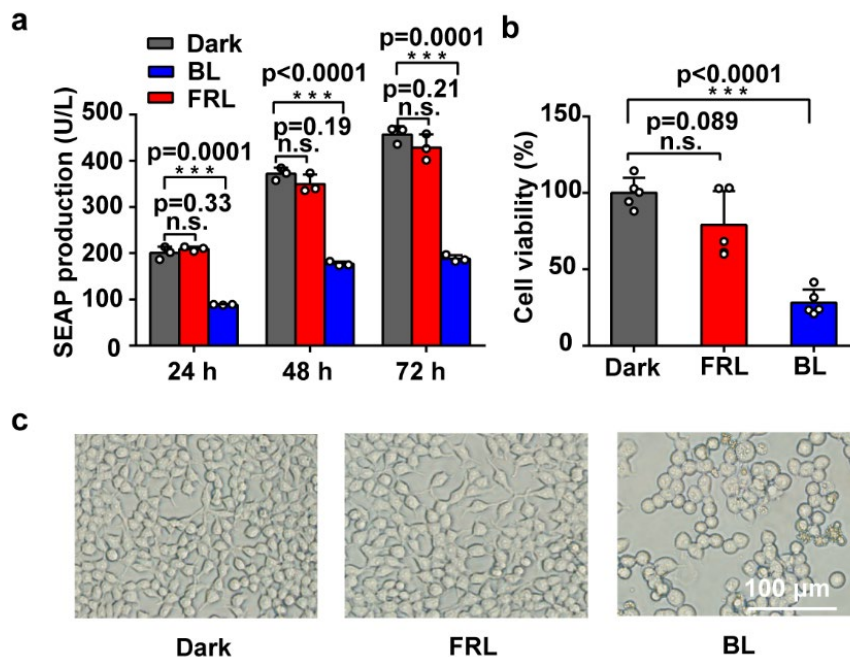

**Supplementary Figure 7. Comparison of the phototoxicity of FRL and blue light (BL) on mammalian cells.** (a) Protein-based metabolic integrity assay of human cells

exposed to FRL and BL.  $6 \times 10^4$  HEK-293 cells seeded in a 24-well plate were transfected with pSEAP2-control (P<sub>SV40</sub>-SEAP-pA, 50 ng) and illuminated for 24, 48, 72 h ( $1.5 \text{ mW cm}^{-2}$ , 730 nm or 460 nm), SEAP expression levels in culture supernatants were profiled. Data represent the mean  $\pm$  SD;  $n = 3$  independent experiments. Comparisons were made with Two-tailed  $t$  test: \*\*\* $P < 0.001$ , Dark v.s. BL; n.s., not significant, Dark v.s. FRL. (b) Cell viability of human cells after exposure to FRL or BL, respectively.  $1 \times 10^4$  HEK-293 cells seeded in a 96-well plate were illuminated with FRL ( $1.5 \text{ mW cm}^{-2}$ , 730 nm) or BL ( $1.5 \text{ mW cm}^{-2}$ , 460 nm) for 24 h and cell viability was assayed using Cell Counting Kit-8. Data represent the mean  $\pm$  SD;  $n = 5$  independent experiments. Comparisons were made with Two-tailed  $t$  test: \*\*\* $P < 0.001$ , Dark v.s. BL; n.s., not significant, Dark v.s. FRL. (c) A representative of bright field microscope image of HEK-293 cells exposed to FRL or BL. Control cells were kept in the dark. Representative images from  $n = 2$  biological replicates. Scale bar, 100  $\mu\text{m}$ . Source data is available in the Source Data file.

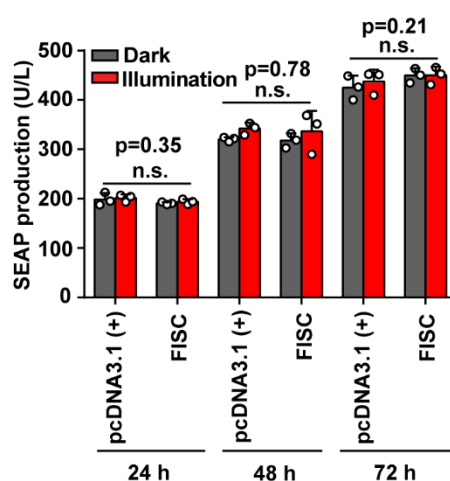

**Supplementary Figure 8. Impact of ectopic FISC constituents' expression and phototoxicity on human cells.**  $6 \times 10^4$  HEK-293 cells were co-transfected with pSEAP2-control (50 ng), pXY137 (100 ng), pXY169 (10 ng), pXY177 (10 ng), and illuminated with FRL ( $1.5 \text{ mW cm}^{-2}$ , 730 nm) for 6 h every 24 h and daily SEAP expression were compared against control cells co-transfected with pSEAP2-control and pcDNA3.1(+) (50 ng/120 ng). Data represent the mean  $\pm$  SD ( $n = 3$  independent experiments). Comparisons were made with Two-tailed  $t$  test: n.s., not significant, FISC v.s. pcDNA3.1. Source data is available in the Source Data file.

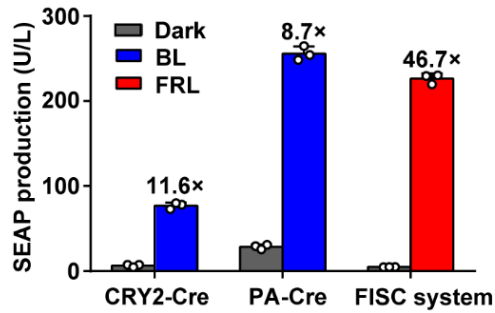

**Supplementary Figure 9. Comparison of the FISC system with CRY2-Cre and PA-Cre system *in vitro*.**  $6 \times 10^4$  HEK-293 cells seeded in a 24-well plate were co-transfected with FISC system [pXY137 (100 ng)/pXY169 (10 ng)/pXY177 (10 ng)/pGY125 (200 ng)] or the CRY2-Cre [pXY240 (14.8 ng)/pGY125 (200 ng)/pcDNA3.1(+) (105.2 ng)] or PA-Cre [PA-Cre (13.4 ng)/pGY125 (200 ng)/pcDNA3.1(+) (106.6 ng)], and then illuminated for 6 h with FRL ( $1.5 \text{ mW cm}^{-2}$ , 730 nm) or BL ( $1.5 \text{ mW cm}^{-2}$ , 460 nm) each day for two days. SEAP expression in the culture supernatants was profiled at 48 h after the first illumination. Data represent the mean  $\pm$  SD;  $n = 3$  independent experiments. Source data is available in the Source Data file.

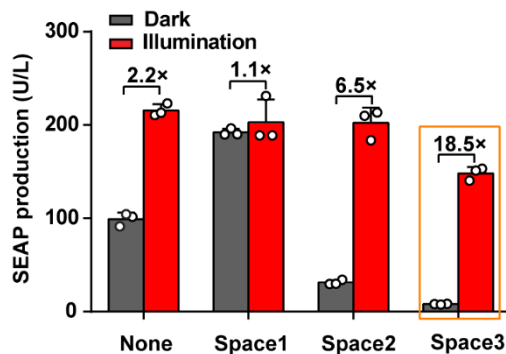

**Supplementary Figure 10. Optimization of the different distance between promoters for two split-Cre sequences in a single plasmid.**  $6 \times 10^4$  HEK-293 cells seeded in a 24-well plate were co-transfected with pXY137 (150 ng), pGY125 (200 ng) and the different plasmid encoding two split-Cre fusion fragments pXY202 (pA-CreC60-L9-DocS-NLS-P<sub>FRLd</sub>::P<sub>hCMV</sub>-CreN59-L9-Coh2-NES-pA, 100 ng; no space), or pXY203 (pA-CreC60-L9-DocS-NLS-P<sub>FRLd</sub>-Space1-P<sub>hCMV</sub>-CreN59-L9-Coh2-NES-P2A-ZeoR-pA, 100 ng; Space1, ~1500 bp), or pXY204 (pA-CreC60-L9-DocS-NLS-P<sub>FRLd</sub>-Space2-P<sub>hCMV</sub>-CreN59-L9-Coh2-NES-P2A-ZeoR-pA, 100 ng; Space2, ~3000 bp) or pXY237 (pA-CreC60-L9-DocS-NLS-P<sub>FRLd</sub>-Space3-P<sub>hCMV</sub>-CreN59-L9-Coh2-NES-P2A-ZeoR-pA, 100 ng; Space3, ~4000 bp) and then illuminated for 6 h with FRL ( $1.5$



mW cm<sup>-2</sup>, 730 nm) each day for two days. SEAP expression in the culture supernatants was profiled at 48 h after the first illumination. All data represent the mean ± SD; *n* = 3 independent experiments. The orange frame marks the highest-fold induction mediated by the FISC system in this experiment. Source data is available in the Source Data file.

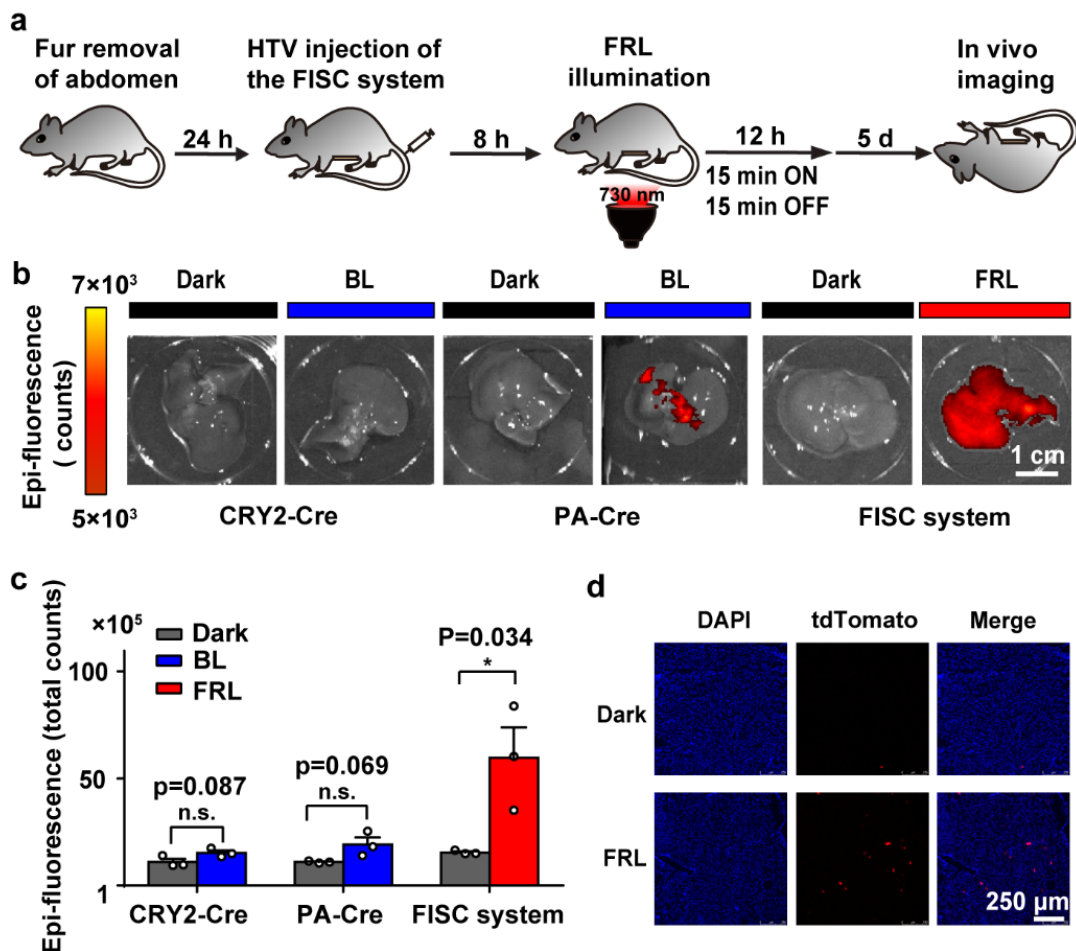

**Supplementary Figure 11. FISC-mediated DNA recombination in transgenic Cre-tdTomato reporter mice via hydrodynamic injection.** (a) Schematic showing the experimental procedure for light-induced DNA recombination activity in the mouse liver. (b) Comparison of the tdTomato expression in the isolated liver tissue of mice injected with the FISC system or with the CRY2-Cre or PA-Cre systems. The mice were hydrodynamically injected with a FISC system iteration comprising two plasmids [pXY137 (150 μg), pXY237 (100 μg)] or the CRY2-Cre system (67 μg) or the PA-Cre system (74 μg) with the same molar concentration of Cre. Eight hours after injection, the mice were kept in the dark or illuminated with FRL (20 mW cm<sup>-2</sup>, 730 nm) or BL (20 mW cm<sup>-2</sup>, 460 nm) for 12 h (15 min on, 15 min off, alternating). Scale bar, 1 cm.

(c) Quantification of the tdTomato expression shown in **b**. Data represent the mean  $\pm$  SEM ( $n = 3$  mice/group). Comparisons were made with Two-tailed  $t$  test: n.s., not significant, Dark v.s. BL;  $*P < 0.05$  Dark v.s. FRL. (d) Representative fluorescence images of the mouse liver sections shown in **b** ( $n = 5$  biological replicates. Scale bar, 250  $\mu$ m). Source data is available in the Source Data file.

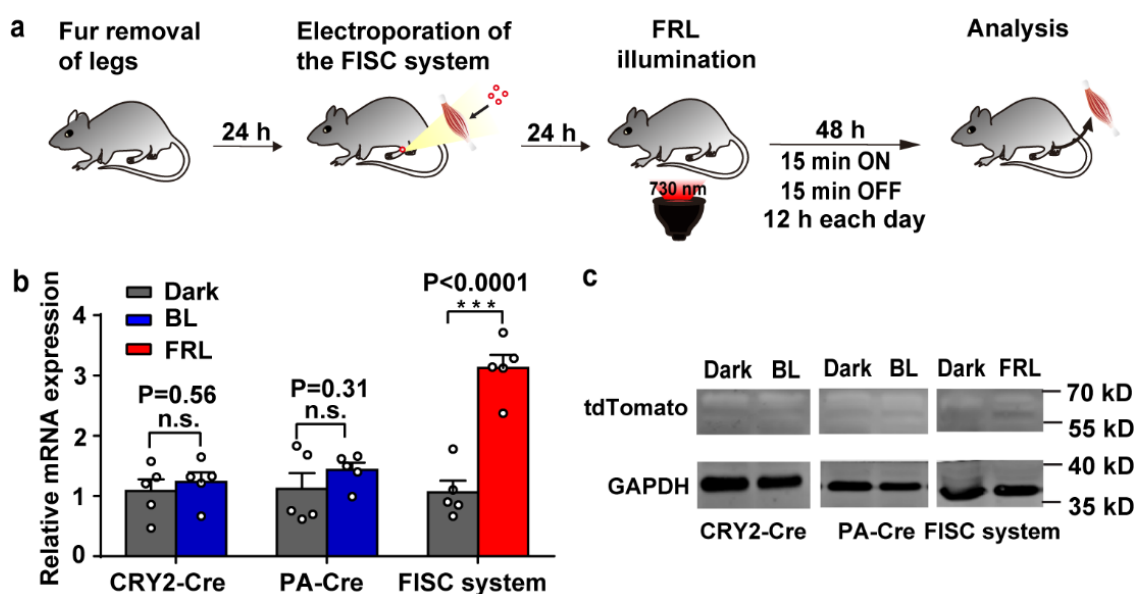

**Supplementary Figure 12. FISC-mediated DNA recombination in the muscle of transgenic Cre-tdTomato reporter mice using electroporation.** (a) Schematic showing the experimental procedure for light-induced DNA recombination activity in mouse muscle. qRT-PCR (b) and Western blotting (c) analysis of tdTomato expression in Cre-tdTomato reporter mice. The light-inducible system components—CRY2-Cre system (40  $\mu$ g), the PA-Cre system (40  $\mu$ g), or a FISC system iteration comprising the pXY137 (20  $\mu$ g) and pXY237 (20  $\mu$ g) plasmids were delivered into the tibialis posterior muscles of the mice. The electroporated mice were kept in the dark or illuminated with FRL (20 mW  $\text{cm}^{-2}$ , 730 nm) or BL (20 mW  $\text{cm}^{-2}$ , 460 nm) for 12 h (15 min on, 15 min off) each day for two days. Muscles were collected at 3 days after electroporation, and tdTomato expression was measured by qRT-PCR (b) and Western blotting (c). Data in **b** represent the mean  $\pm$  SEM ( $n = 5$  mice/group). Comparisons were made with Two-tailed  $t$  test: n.s., not significant, Dark v.s. BL;  $***P < 0.001$  Dark v.s. FRL. Western blotting images are representative of three mice from two independent experiments. Source data is available in the Source Data file.

**Supplementary Table 1. Different linker amino acid sequences**

| <b>name</b> | <b>amino acid sequence</b> | <b>linker</b>        |
|-------------|----------------------------|----------------------|
| L1          | GT                         | short linker         |
| L2          | LEASTGGSGT                 | flexible linker      |
| L3          | ASPSNPGASNGS               | semi-flexible linker |
| L4          | LEASPSNPGASNGSGT           | semi-flexible linker |
| L5          | DD                         | short linker         |
| L6          | DV                         | short linker         |
| L7          | EQ                         | short linker         |
| L8          | GGGDV                      | flexible linker      |
| L9          | LEASPSNPGASNGS             | semi-flexible linker |
| L10         | LEASPSNPGASN               | semi-flexible linker |
| L11         | LEASPSNPGA                 | semi-flexible linker |
| L12         | GGGGSGGGGSGGGGR            | flexible linker      |

**Supplementary Table 2. Different combinations of the linkers in Docs-CreC60 or Coh2-CreN59**

| <b>Docs-Linker-<br/>CreC60<br/>CreN59-<br/>Linker-Coh2</b> | <b>pXY157<br/>(L1)</b> | <b>pXY158<br/>(L2)</b> | <b>pXY159<br/>(L3)</b> | <b>pXY160<br/>(L4)</b> | <b>pXY173<br/>(L5)</b> | <b>pXY174<br/>(L6)</b> | <b>pXY175<br/>(L7)</b> | <b>pXY176<br/>(L8)</b> | <b>pXY177<br/>(L9)</b> | <b>pXY178<br/>(L10)</b> | <b>pXY179<br/>(L11)</b> |
|------------------------------------------------------------|------------------------|------------------------|------------------------|------------------------|------------------------|------------------------|------------------------|------------------------|------------------------|-------------------------|-------------------------|
| <b>pXY146 (L1)</b>                                         | <b>L1/L1</b>           | <b>L1/L2</b>           | <b>L1/L3</b>           | <b>L1/L4</b>           | -                      | -                      | -                      | -                      | -                      | -                       | -                       |
| <b>pXY147 (L2)</b>                                         | <b>L2/L1</b>           | <b>L2/L2</b>           | <b>L2/L3</b>           | <b>L2/L4</b>           | -                      | -                      | -                      | -                      | -                      | -                       | -                       |
| <b>pXY150 (L3)</b>                                         | <b>L3/L1</b>           | <b>L3/L2</b>           | <b>L3/L3</b>           | <b>L3/L4</b>           | -                      | -                      | -                      | -                      | -                      | -                       | -                       |
| <b>pXY151 (L4)</b>                                         | <b>L4/L1</b>           | <b>L4/L2</b>           | <b>L4/L3</b>           | <b>L4/L4</b>           | -                      | -                      | -                      | -                      | -                      | -                       | -                       |
| <b>pXY165 (L5)</b>                                         | -                      | -                      | -                      | -                      | <b>L5/L5</b>           | <b>L5/L6</b>           | <b>L5/L7</b>           | <b>L5/L8</b>           | <b>L5/L9</b>           | <b>L5/L10</b>           | <b>L5/L11</b>           |
| <b>pXY166 (L6)</b>                                         | -                      | -                      | -                      | -                      | <b>L6/L5</b>           | <b>L6/L6</b>           | <b>L6/L7</b>           | <b>L6/L8</b>           | <b>L6/L9</b>           | <b>L6/L10</b>           | <b>L6/L11</b>           |
| <b>pXY167 (L7)</b>                                         | -                      | -                      | -                      | -                      | <b>L7/L5</b>           | <b>L7/L6</b>           | <b>L7/L7</b>           | <b>L7/L8</b>           | <b>L7/L9</b>           | <b>L7/L10</b>           | <b>L7/L11</b>           |
| <b>pXY168 (L8)</b>                                         | -                      | -                      | -                      | -                      | <b>L8/L5</b>           | <b>L8/L6</b>           | <b>L8/L7</b>           | <b>L8/L8</b>           | <b>L8/L9</b>           | <b>L8/L10</b>           | <b>L8/L11</b>           |
| <b>pXY169 (L9)</b>                                         | -                      | -                      | -                      | -                      | <b>L9/L5</b>           | <b>L9/L6</b>           | <b>L9/L7</b>           | <b>L9/L8</b>           | <b>L9/L9</b>           | <b>L9/L10</b>           | <b>L9/L11</b>           |
| <b>pXY170 (L10)</b>                                        | -                      | -                      | -                      | -                      | <b>L10/L5</b>          | <b>L10/L6</b>          | <b>L10/L7</b>          | <b>L10/L8</b>          | <b>L10/L9</b>          | <b>L10/L10</b>          | <b>L10/L11</b>          |
| <b>pXY171 (L11)</b>                                        | -                      | -                      | -                      | -                      | <b>L11/L5</b>          | <b>L11/L6</b>          | <b>L11/L7</b>          | <b>L11/L8</b>          | <b>L11/L9</b>          | <b>L11/L10</b>          | <b>L11/L11</b>          |

**Supplementary Table 3. Comparison of the FISC-mediated DNA recombination efficiency using three different delivery methods in transgenic Cre-tdTomato reporter mice**

| Delivery methods              | Bioluminescence measurements of isolated liver tissue | qPCR analysis | Western blot analysis | Fluorescence images of liver sections |
|-------------------------------|-------------------------------------------------------|---------------|-----------------------|---------------------------------------|
| <b>Hydrodynamic injection</b> | 3.5-fold                                              | /             | /                     |                                       |
| <b>Electroporation</b>        | /                                                     | 2.9-fold      |                       | /                                     |
| <b>AAV transduction</b>       | 20.4-fold                                             | 4.7-fold      |                       |                                       |

Data were expressed as fold change of FISC-mediated DNA recombination in FRL-illuminated mice compared with control mice kept in the dark.

**Supplementary Table 4. Plasmids designed and used in this study**

| <b>Plasmid</b> | <b>Description and Cloning Strategy</b>                                                                                                                                 | <b>Reference</b>                    |
|----------------|-------------------------------------------------------------------------------------------------------------------------------------------------------------------------|-------------------------------------|
| pcDNA3.1(+)    | Constitutive P <sub>hCMV</sub> -driven mammalian expression vector [P <sub>hCMV</sub> -MCS-pA].                                                                         | Invitrogen'<br>CA                   |
| pSEAP2-control | Constitutive P <sub>SV40</sub> -driven SEAP expression vector [P <sub>SV40</sub> -SEAP-pA].                                                                             | Clontech'<br>CA                     |
| PA-Cre         | Constitutive P <sub>hCMV</sub> -driven CreN59-nMag and pMag-CreC60 expression vector [P <sub>hCMV</sub> -CreN59-L1-nMag-NLS-P2A-NLS-pMag-L1-CreC60-pA].                 | Kawano, <i>et al.</i> <sup>1</sup>  |
| pXY34          | FRTA-specific FRL-inducible SEAP expression vector [P <sub>FRLa</sub> -SEAP-pA; P <sub>FRLa</sub> , pA-(whiG) <sub>3</sub> -P <sub>hCMVmin</sub> ].                     | J. Shao, <i>et al.</i> <sup>2</sup> |
| pXY110         | Constitutive P <sub>hCMV</sub> -driven CreN59-L0-Coh2 expression vector [P <sub>hCMV</sub> -CreN59-L0-Coh2-NES-pA].                                                     | This work                           |
| pXY111         | FRTA-specific FRL-inducible DocS-L0-CreC60 expression vector [P <sub>FRLa</sub> -NLS-DocS-L0-CreC60-pA].                                                                | This work                           |
| pXY121         | FRTA-specific FRL-inducible DocS-L0-CreC60 expression vector [P <sub>FRLc</sub> -NLS-DocS-L0-CreC60-pA; P <sub>FRLc</sub> , pA-(whiG) <sub>3</sub> -P <sub>min</sub> ]. | This work                           |
| pXY133         | FRTA-specific FRL-inducible DocS-L0-CreC60 expression vector [P <sub>FRLd</sub> -NLS-DocS-L0-CreC60-pA; P <sub>FRLd</sub> , pA-(whiG) <sub>3</sub> -TATA].              | This work                           |
| pXY137         | Constitutive P <sub>hCMV</sub> -driven BldD, BphS and YhjH expression vector [P <sub>hCMV</sub> -p65-VP64-L0-BldD-pA::P <sub>hCMV</sub> - BphS-P2A-YhjH-pA].            | This work                           |
| pXY146         | Constitutive P <sub>hCMV</sub> -driven CreN59-L1-Coh2 expression vector [P <sub>hCMV</sub> -CreN59-L1-Coh2-NES-pA].                                                     | This work                           |
| pXY147         | Constitutive P <sub>hCMV</sub> -driven CreN59-L2-Coh2 expression vector [P <sub>hCMV</sub> -CreN59-L2-Coh2-NES-pA].                                                     | This work                           |
| pXY150         | Constitutive P <sub>hCMV</sub> -driven CreN59-L3-Coh2 expression vector [P <sub>hCMV</sub> -CreN59-L3-Coh2-NES-pA].                                                     | This work                           |
| pXY151         | Constitutive P <sub>hCMV</sub> -driven CreN59-L4-Coh2 expression vector [P <sub>hCMV</sub> -CreN59-L4-Coh2-NES-pA].                                                     | This work                           |
| pXY157         | FRTA-specific FRL-inducible DocS-L1-CreC60 expression vector [P <sub>FRLd</sub> -NLS-DocS-L1-CreC60-pA].                                                                | This work                           |
| pXY158         | FRTA-specific FRL-inducible DocS-L2-CreC60 expression vector [P <sub>FRLd</sub> -NLS-DocS-L2-CreC60-pA].                                                                | This work                           |
| pXY159         | FRTA-specific FRL-inducible DocS-L3-CreC60 expression vector [P <sub>FRLd</sub> -NLS-DocS-L3-CreC60-pA].                                                                | This work                           |
| pXY160         | FRTA-specific FRL-inducible DocS-L4-CreC60 expression vector [P <sub>FRLd</sub> -NLS-DocS-L4-CreC60-pA].                                                                | This work                           |
| pXY165         | Constitutive P <sub>hCMV</sub> -driven CreN59-L5-Coh2 expression vector [P <sub>hCMV</sub> -CreN59-L5-Coh2-NES-pA].                                                     | This work                           |

|         |                                                                                                                                                                                                                                        |             |
|---------|----------------------------------------------------------------------------------------------------------------------------------------------------------------------------------------------------------------------------------------|-------------|
| pXY166  | Constitutive P <sub>hCMV</sub> -driven CreN59-L6-Coh2 expression vector [P <sub>hCMV</sub> -CreN59-L6-Coh2-NES-pA].                                                                                                                    | This work   |
| pXY167  | Constitutive P <sub>hCMV</sub> -driven CreN59-L7-Coh2 expression vector [P <sub>hCMV</sub> -CreN59-L7-Coh2-NES-pA].                                                                                                                    | This work   |
| pXY168  | Constitutive P <sub>hCMV</sub> -driven CreN59-L8-Coh2 expression vector [P <sub>hCMV</sub> -CreN59-L8-Coh2-NES-pA].                                                                                                                    | This work   |
| pXY169  | Constitutive P <sub>hCMV</sub> -driven CreN59-L9-Coh2 expression vector [P <sub>hCMV</sub> -CreN59-L9-Coh2-NES-pA].                                                                                                                    | This work   |
| pXY170  | Constitutive P <sub>hCMV</sub> -driven CreN59-L10-Coh2 expression vector [P <sub>hCMV</sub> -CreN59-L10-Coh2-NES-pA].                                                                                                                  | This work   |
| pXY171  | Constitutive P <sub>hCMV</sub> -driven CreN59-L11-Coh2 expression vector [P <sub>hCMV</sub> -CreN59-L11-Coh2-NES-pA].                                                                                                                  | This work   |
| pXY173  | FRTA-specific FRL-inducible DocS-L5-CreC60 expression vector [P <sub>FRLd</sub> -NLS-DocS-L5-CreC60-pA].                                                                                                                               | This work   |
| pXY174  | FRTA-specific FRL-inducible DocS-L6-CreC60 expression vector [P <sub>FRLd</sub> -NLS-DocS-L6-CreC60-pA].                                                                                                                               | This work   |
| pXY175  | FRTA-specific FRL-inducible DocS-L7-CreC60 expression vector [P <sub>FRLd</sub> -NLS-DocS-L7-CreC60-pA].                                                                                                                               | This work   |
| pXY176  | FRTA-specific FRL-inducible DocS-L8-CreC60 expression vector [P <sub>FRLd</sub> -NLS-DocS-L8-CreC60-pA].                                                                                                                               | This work   |
| pXY177  | FRTA-specific FRL-inducible DocS-L9-CreC60 expression vector [P <sub>FRLd</sub> -NLS-DocS-L9-CreC60-pA].                                                                                                                               | This work   |
| pXY178  | FRTA-specific FRL-inducible DocS-L10-CreC60 expression vector [P <sub>FRLd</sub> -NLS-DocS-L10-CreC60-pA].                                                                                                                             | This work   |
| pXY179  | FRTA-specific FRL-inducible DocS-L11-CreC60 expression vector [P <sub>FRLd</sub> -NLS-DocS-L11-CreC60-pA].                                                                                                                             | This work   |
| pXY185  | Cre-inducible and P <sub>hCMV</sub> -driven luciferase expression vector [P <sub>hCMV</sub> - <i>loxP</i> -STOP- <i>loxP</i> -Luciferase-pA].                                                                                          | This work   |
| pXY 202 | FRTA-specific FRL-inducible Docs-L9-CreC60 expression and constitutive P <sub>hCMV</sub> -driven CreN59-L9-Coh2 expression vector [pA-CreC60-L9-DocS-NLS-P <sub>FRLd</sub> ::P <sub>hCMV</sub> -CreN59-L9-Coh2-NES-pA].                | This work   |
| pXY203  | FRTA-specific FRL-inducible Docs-L9-CreC60 expression and constitutive P <sub>hCMV</sub> -driven CreN59-L9-Coh2 expression vector [pA-CreC60-L9-DocS-NLS-P <sub>FRLd</sub> -Space1-P <sub>hCMV</sub> -CreN59-L9-Coh2-NES-P2A-ZeoR-pA]. | This work   |
| pXY204  | FRTA-specific FRL-inducible Docs-L9-CreC60 expression and constitutive P <sub>hCMV</sub> -driven CreN59-L9-Coh2 expression vector [pA-CreC60-L9-DocS-NLS-P <sub>FRLd</sub> -Space2-P <sub>hCMV</sub> -CreN59-L9-Coh2-NES-P2A-ZeoR-pA]. | This work   |
| pXY229  | Cre-inducible and P <sub>hCMV</sub> -driven SEAP expression vector [P <sub>hCMV</sub> - <i>lox2272</i> -STOP- <i>lox2272</i> -SEAP-pA].                                                                                                | This work   |
| pXY230  | Cre-inducible and P <sub>hCMV</sub> -driven SEAP expression vector [P <sub>hCMV</sub> - <i>lox66</i> -STOP- <i>lox66</i> -SEAP-pA].                                                                                                    | This work   |
| pXY231  | Cre-inducible and P <sub>hCMV</sub> -driven SEAP expression vector [P <sub>hCMV</sub> - <i>lox71</i> -STOP- <i>lox71</i> -SEAP-pA].                                                                                                    | This work   |
| pXY232  | Cre-inducible and P <sub>hCMV</sub> -driven SEAP expression vector [P <sub>hCMV</sub> - <i>lox72</i> -STOP- <i>lox72</i> -SEAP-pA].                                                                                                    | This work   |
| pXY233  | Cre-inducible and P <sub>hCMV</sub> -driven SEAP expression vector [P <sub>hCMV</sub> - <i>JT15</i> -STOP- <i>JT15</i> -SEAP-pA].                                                                                                      | This work   |
| pXY234  | Cre-inducible and P <sub>hCMV</sub> -driven SEAP expression vector [P <sub>hCMV</sub> - <i>JTZ17</i> -STOP- <i>JTZ17</i> -SEAP-pA].                                                                                                    | This work   |
| pXY235  | Cre-inducible and P <sub>hCMV</sub> -driven SEAP expression vector [P <sub>hCMV</sub> - <i>JT15</i> - <i>JTZ17</i> -STOP- <i>JT15</i> - <i>JTZ17</i> -SEAP-pA].                                                                        | This work   |
| pXY237  | FRTA-specific FRL-inducible CreC60-L9-DocS expression and constitutive P <sub>hCMV</sub> -driven CreN59-L9-Coh2 expression vector [pA-CreC60-L9-DocS-NLS-P <sub>FRLd</sub> -Space3-P <sub>hCMV</sub> -CreN59-L9-Coh2-NES-P2A-ZeoR-pA]. | This work   |
| pXY240  | Constitutive P <sub>hCMV</sub> -driven CIB1-L12-CreC106 and CRY2-L12-CreN104 expression vector [P <sub>hCMV</sub> -CIB1-L12-                                                                                                           | Taslimi, A. |

|         |                                                                                                                                                                                                                                                 |                            |
|---------|-------------------------------------------------------------------------------------------------------------------------------------------------------------------------------------------------------------------------------------------------|----------------------------|
|         | CreC106-IRES-CRY2-L12-CreN104-pA].                                                                                                                                                                                                              | <i>et al.</i> <sup>3</sup> |
| pCRE5   | AAV vector encoding constitutive P <sub>hCMV</sub> -driven expression unit for CreN59-L9-Coh2 [ITR-P <sub>hCMV</sub> -CreN59-L9-Coh2-NES-pA-ITR].                                                                                               | This work                  |
| pCRE14  | AAV vector encoding constitutive P <sub>hCMV</sub> -driven expression unit for BphS [ITR-P <sub>hCMV</sub> -BphS-pA-ITR].                                                                                                                       | This work                  |
| pCRE23  | AAV vector encoding constitutive P <sub>hCMV</sub> -driven expression unit for BldD and FRTA-specific FRL-inducible expression unit for Docs-L9-CreC60 [ITR-P <sub>hCMV</sub> -p65-VP64-BldD-pA::P <sub>FRLd</sub> -NLS-Docs-L9-CreC60-pA-ITR]. | This work                  |
| pGY 125 | Cre-inducible and P <sub>hCMV</sub> -driven SEAP expression vector [P <sub>hCMV</sub> - <i>loxP</i> -STOP- <i>loxP</i> -SEAP-pA].                                                                                                               | This work                  |
| pDL78   | Cre-inducible and P <sub>hCMV</sub> -driven EGFP expression vector [P <sub>hCMV</sub> - <i>loxP</i> -STOP- <i>loxP</i> -EGFP-pA].                                                                                                               | This work                  |

**Abbreviations:** **BldD**, *Streptomyces coelicolor* transcription factor regulating hyphae formation; **BphS**, engineered bacterial diguanylate cyclase; **CIB1**, Cryptochrome-interacting basic-helix-loop-helix 1; **Coh2**, anchoring proteins of *C. thermocellum*; **Cre**, Cyclization Recombination Enzyme; **CRY2**, Cryptochrome 2 in *Arabidopsis thaliana*; **DocS**, *C. thermocellum* interacting partner of Coh2; **EGFP**, enhanced green fluorescent protein; **FRL**, far-red light; **FRTA**, mammalian far-red light-dependent transactivator (p65-VP64-BldD); **FISC**, far-red light-induced split Cre-*loxP* system; **GOI**, gene of interest; **IRES**, internal ribosome entry site; **ITR**, inverted terminal repeat; **loxP**, a 34 bp sequence from P1 phage that Cre recombinase binds (5'-ATAACTTCGTATAGCATACATTATACGAAGTTAT-3'); **NES**, nuclear export signal; **NLS**, nuclear localization signal; **P2A**, picornavirus-derived self-cleaving peptide engineered for bicistronic gene expression in mammalian cells; **p65**, 65 kDa transactivator subunit of NF-κB; **pA**, polyadenylation signal; **PCR**, polymerase chain reaction; **P<sub>FRLx</sub>**, BldD-based synthetic mammalian far-red light-inducible promoter variants; **P<sub>hCMV</sub>**, human cytomegalovirus immediate early promoter; **P<sub>hCMVmin</sub>**, minimal version of P<sub>hCMV</sub>; **P<sub>min</sub>**, minimal eukaryotic promoter; **ROI**, region of interest; **SEAP**, human placental secreted alkaline phosphatase; **STOP**, a long fragment contains polyadenylation signal to prevent transcription; **TATA**, minimal eukaryotic promoter with only TATA box; **VP64**, tetrameric core of Herpes simplex virus-derived transactivation domain; **whiG**, BldD-specific binding sequence; **YhjH**, bacterial c-di-GMP phosphodiester.



**Supplementary Table 5. Primers used in this study**

| <b>name</b>                 | <b>Forward Primers (5' to 3')</b>                                                                | <b>Reverse Primer (5' to 3')</b>                                                                                 |
|-----------------------------|--------------------------------------------------------------------------------------------------|------------------------------------------------------------------------------------------------------------------|
| CreN59                      | ATGTCCAATTTACTGACCG                                                                              | ATTCAACTTGCACCATGCCG                                                                                             |
| Coh2-NES                    | GTGGTGGTGGAGATCGGCAAGG                                                                           | CAGCTGGTAGGGCGTACAGGATC                                                                                          |
| NLS-DocS                    | GCCAGTCCCAAGAAGAAGAGAAAGGTGGAGGC<br>GTAGCACCAAGCTGTACGGCGAC                                      | GTTCTTGTAGGGCAGGGTGTC                                                                                            |
| CreC60                      | AACCGGAAATGGTTTCCCGC                                                                             | ATCCCCATCTTCCAGCAGGC                                                                                             |
| Pmin                        | <u>gg</u> GTCGACAGCGGAGACTCTAGAGGGTATATAAT<br>GGAAGCTCGACTTCCAGCTTGGCAATCCGGTAC<br>TGTTGGTAAAg   | <u>aattc</u> TTTACCAACAGTACCGGATTGCCAAGCTGGAA<br>GTCGAGCTTCCATTATATAACCCTCTAGAGTCTCCGC<br>TGTCGAC <u>cctgca</u>  |
| TATA                        | <u>gg</u> AGAGGGTATATAATGGAAGCTCGAATTCCAGA<br>AGCTTATACTCAGTGCCCTGACTATATACTCAGT<br>GCCCTGACTATg | <u>aattc</u> ATAGTCAGGGCACTGAGTATATAGTCAGGGCAC<br>TGAGTATAAGCTTCTGGAATTCGAGCTTCCATTATAT<br>ACCCTCT <u>tctgca</u> |
| Luciferase                  | GCCACCATGGAAGACGCCAA                                                                             | CTCGAAGCGGCCGGCCGCCCGAC                                                                                          |
| <i>lox2272-STOP-lox2272</i> | ATAACTTCGTATAAAGTATCCTATACGAAGTTATG<br>TCCGAACAAACGACCCAACACCCG                                  | ATAACTTCGTATAGGATACTTTATAACGAAGTTATACT<br>TACCATGTCAGATCCAGACATGATA                                              |
| <i>lox66-STOP-lox66</i>     | TACCGTTCGTATAATGTATGCTATACGAAGTTATG<br>GATCCGAACAAACGACCCAACACCCG                                | ATAACTTCGTATAGCATAACATTATAACGAACGGTAACT<br>TACCATGTCAGATCCAGACATGATA                                             |
| <i>lox71-STOP-lox71</i>     | ATAACTTCGTATAATGTATGCTATACGAACGGTAG                                                              | TACCGTTCGTATAGCATAACATTATAACGAAGTTATACT                                                                          |

|                                        |                                                                   |                                                                    |
|----------------------------------------|-------------------------------------------------------------------|--------------------------------------------------------------------|
|                                        | ATCCGAACAAACGACCCAACACCCG                                         | TACCATGTCAGATCCAGACATGAT                                           |
| <i>lox72-STOP-lox72</i>                | TACCGTTCGTATAATGTATGCTATACGAACGGTA<br>GGATCCGAACAAACGACCCAACACCCG | TACCGTTCGTATAGCATAACATTATACGAACGGTAACT<br>TACCATGTCAGATCCAGACATGAT |
| <i>JT15-STOP-JT15</i>                  | ATAACTTCGTATAATGTATGCTATACGAATAATTG<br>GATCCGAACAAACGACCCAACACCCG | AATTATTCGTATAGCATAACATTATACGAAGTTATACTT<br>ACCATGTCAGATCCAGACATGAT |
| <i>JTZ17-STOP-JTZ17</i>                | ATAAATTGCTATAATGTATGCTATACGAAGTTATG<br>GATCCGAACAAACGACCCAACACCCG | ATAACTTCGTATAGCATAACATTATAGCAATTTATACTT<br>ACCATGTCAGATCCAGACATGAT |
| <i>JT15-JTZ17-STOP-JT15-<br/>JTZ17</i> | ATAAATTGCTATAATGTATGCTATACGAATAATTG<br>GATCCGAACAAACGACCCAACACCCG | AATTATTCGTATAGCATAACATTATAGCAATTTATACTT<br>ACCATGTCAGATCCAGACATGAT |
| <i>BphS</i>                            | GATGTACGGGCCAGATATACGC                                            | GGTTCCTTCCGCCTCAGAAG                                               |

## Amino acids or DNA sequence information

### 1. FRTA: p65-VP64-Linker-BldD

MPSGQISNQALALAPSSAPVLAQTMVPSSAMVPLAQPPAPAPVLTGPPQSLMGSGRADA  
LDDFDLDMLGSDALDDFDLDMLGSDALDDFDLDMLGSDALDDFDLMLINASGSGGGG  
DVMASPKKKRKVEASSEYAKQLGAKLRAIRTQQGLSLHGVEEKSQGRWKAVVVGSYER  
GDRAVTVQRLAELADFYGVVQELLPGTTPGGAAEPPPKLVDLERLAHVPEKAGPLQR  
YAATIQSQRGDYNGKVL SIRQDDLRTLAVIYDQSPSVLTEQLISWGVLDADARRAVAHEEN

### 2. FRS: BphS-P2A-YhjH

MARGCLMTISGGTFDP SICE MEPIATPGAIQPHGALMTARADSGRVAHASVNLGEILGLPA  
ASVLGAPIGEVIGRVNEILLREARRSGSETPETIGSFRRSDGQLLHLHAFQSGDYMCLDIEP  
VRDEDGRLPPGARQSVIETFSSAMTQVELCELAVHGLQLVLGYDRVMAYRFGADGHGEVI  
AERRRQDLEPYLGLHYPASDIPQIARALYLRQRVGAIADACYRPVPLLGHPELDDGKPLDL  
THSSLRSVSPVHLDYMQNMNTAASLTIGLADGDRWGMVCHNTTPRIAGPEWRAAAG  
MIGQVVSLLSRLGEVENAAETLARQSTLSTLVERLSTGDTLAAAFVAADQLILDVVGASA  
AVVRLAGQELHFGRTPPVDAMQKVLDSLGRPSPLEVLSLDDVTLRHPELPELLAAGSGILL  
LPLTSGDGLIAWFRPEHVQTITWGGNPAEHGTWNPATQMRMRPRASFDWKETVTGRSLP  
WTS AERN CARELGEAIAAEMAQRTRAEELERVAMVDSLTRLWNRLGIETLLKREWEYATR  
KNSPISIVMIDFDNFKQINDQHGLVGVDEVLQGSARLIISVLA SYDILGRWGGDEFMLILPG  
SGREQTAVLLERI QATIAQNPVPTSAGPMAISLSMGGVSVFTNQGEALQYWVEQADNQLM  
KVKRLGKGNFQLAEYHHHHHHHSGGATNFSLLKQAGDVEENPGPSGIRQVIQRISNPEASIE  
SLQERRFWLQCERAYTWQPIYQTCGRLMAVELLTVVTHPLNPSQRLPPDRYFTEITVSHR  
MEVVKEQIDLLAQKADFFIEHGLLASVNIDGPTLIALRQPKILRQIERLPWLRFELVEHIR  
LPKDSTFASMCEFGPLWLD DFGTGMANFSALSEVRYDYIKIAREL FVMLRQSPEGRTLFSQ  
LLHLMNRYCRGVIVEGVETPEEWRDVQNSPAFAAQGWFLSRPAPIETLNTAVLAL

### 3. Cre

MSNLLTVHQNLPALPVDATSDEV RKNLMDMFRDRQAFSEHTWKMLLSVCRS WAAWCKL  
NNRKFPAEPEDVRDYLLYLQARGLAVKTIQQHLGQLNMLHRRSGLPRPSDSNAVSLVM  
RRIRKENVDAGERAKQALAFERTDFDQVRSLMENS DRCQDIRNLAFLGIAYNTLLRIA EIA  
RIRVKDISRTDGG RMLIHIGRTKTLVSTAGVEKALSLGVTKLVERWISVSGVADDPNNYLFC  
RVRKNGVAAPSATSQ LSTRALEGIFEATHRLIYGAKDDSGQRYLAWSGHSARVGAARDMA  
RAGVSIPEIMQAGGW TNVNIVMNYIRNLDSETGAMVRLLEDGD

### 4. P<sub>FRLa</sub>: pA-3×whiG-P<sub>hCMVmin</sub>

CAGACATGATAAGATACATTGATGAGTTTGGACAAACCACA ACTAGAATGCAGTGAAA  
AAAATGCTTTATTTGTGAAATTTGTGATGCTATTGCTTTATTTGTAACCATTATAAGCTGC  
AATAACAAGTTAACAACAACAATTGCATTCATTTATGTTTCAGGTT CAGGGGGAGGT

GTGGGAGGTTTTTTAAACCTCACGCTACGCTCACTCACGCTACGCTCACTCACGCTACG  
CTCACCTGCAGGTCGAGCTCGGTACCCGGGTCGAGTAGGCGTGTACGGTGGGAGGCCT  
ATATAAGCAGAGCTCGTTTAGTGAACCGTCAGATCGCCTGGAGACGCCATCCACGCTG  
TTTTGACCTCCATAGAAGACACCGGGACCGATCCAGCCTCCGCG

5. **P<sub>FRL</sub>: pA-3×whiG-P<sub>min</sub>**

CAGACATGATAAGATACATTGATGAGTTTGGACAAACCACAACCTAGAATGCAGTGAAA  
AAAATGCTTTATTTGTGAAATTTGTGATGCTATTGCTTTATTTGTAACCATTATAAGCTGC  
AATAACAAGTTAACAACAACAATTGCATTCATTTTATGTTTCAGGTTTCAGGGGGAGGT  
GTGGGAGGTTTTTTAAACCTCACGCTACGCTCACTCACGCTACGCTCACTCACGCTACG  
CTCACCTGCAGGGTCGACAGCGGAGACTCTAGAGGGTATATAATGGAAGCTCGACTTC  
CAGCTTGGCAATCCGGTACTGTTGGTAAA

6. **P<sub>FRL</sub>: pA-3×whiG-TATA**

CAGACATGATAAGATACATTGATGAGTTTGGACAAACCACAACCTAGAATGCAGTGAAA  
AAAATGCTTTATTTGTGAAATTTGTGATGCTATTGCTTTATTTGTAACCATTATAAGCTGC  
AATAACAAGTTAACAACAACAATTGCATTCATTTTATGTTTCAGGTTTCAGGGGGAGGT  
GTGGGAGGTTTTTTAAACCTCACGCTACGCTCACTCACGCTACGCTCACTCACGCTACG  
CTCACCTGCAGGAGAGGGTATATAATGGAAGCTCGAATTCCAGAAGCTTATACTCAGTG  
CCCTGACTATATACTCAGTGCCCTGACTAT

### Supplementary References

1. Kawano, F., Okazaki, R., Yazawa, M. & Sato, M. A photoactivatable Cre-loxP recombination system for optogenetic genome engineering. *Nat. Chem. Biol.* **12**, 1059-1064 (2016).
2. Shao, J. *et al.* Smartphone-controlled optogenetically engineered cells enable semiautomatic glucose homeostasis in diabetic mice. *Sci. Transl. Med.* **9**, eaal2298 (2017).
3. Taslimi, A. *et al.* Optimized second-generation CRY2-CIB dimerizers and photoactivatable Cre recombinase. *Nat. Chem. Biol.* **12**, 425-430 (2016).
